# Supplementary material for: Quantitative Susceptibility Mapping of Brain Iron Deposition in Patients With Recurrent Depression
Source: PubMed Central journal article supplement — Psychiatry Investig. 2022 Aug 24;19(8):668–75. doi: 10.30773/pi.2022.0110 (PMC9441458; doi:10.30773/pi.2022.0110), 2022-08-24
Supplement: pi-2022-0110-suppl1.pdf [file pi-2022-0110-suppl1.pdf]

**Supplementary Table 1.** Comparison before and after treatment

|                | HDRS<br>(scores) | Frontal lobe<br>(ppm) | Temporal lobe<br>(ppm) | Occipital lobe<br>(ppm) | Hippocampus<br>(ppm) | Putamen<br>(ppm) | Thalamus<br>(ppm) | Cingulum<br>(ppm) | Cerebellum<br>(ppm) |
|----------------|------------------|-----------------------|------------------------|-------------------------|----------------------|------------------|-------------------|-------------------|---------------------|
| Pre-treatment  | 27.2±5.3         | 0.021±0.002           | 0.019±0.001            | 0.019±0.001             | 0.024±0.002          | 0.020±0.001      | 0.018±0.002       | 0.048±0.003       | 0.021±0.002         |
| Post-treatment | 7.4±1.2          | 0.020±0.002           | 0.019±0.001            | 0.020±0.002             | 0.023±0.001          | 0.020±0.002      | 0.019±0.001       | 0.047±0.003       | 0.020±0.002         |
| t              | 16.295           | 1.581                 | 0.000                  | -2.000                  | 2.000                | 0.000            | -2.000            | 1.054             | 2.000               |
| p              | <0.001           | 0.122                 | >0.999                 | 0.053                   | 0.053                | >0.999           | 0.053             | 0.299             | 0.053               |
