# Supplementary material for: Quantitative Susceptibility Mapping of Brain Iron Deposition in Patients With Recurrent Depression
Source: PubMed Central journal article supplement — Psychiatry Investig. 2022 Aug 24;19(8):668–75. doi: 10.30773/pi.2022.0110 (PMC9441458; doi:10.30773/pi.2022.0110), 2022-08-24
Supplement: pi-2022-0110-suppl2.pdf [file pi-2022-0110-suppl2.pdf]

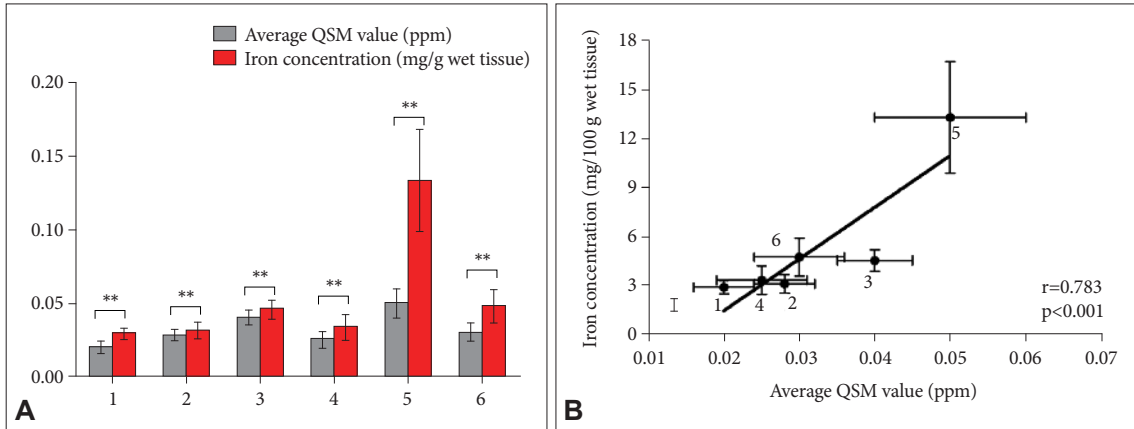

**Supplementary Figure 1.** The differences and relationship between average QSM value and iron concentration. A: Differences between averaged susceptibility of brain regions from controls in this study and the iron concentration in postmortem samples reported in Hallgren and Sourander.<sup>23</sup> B: The relationship between averaged susceptibility of brain regions in controls in this study and the iron concentration in postmortem samples reported in Hallgren and Sourander.<sup>23</sup> \*\* $p<0.01$ . 1, frontal lobe; 2, temporal lobe; 3, occipital lobe; 4, cerebellum; 5, putamen; 6, thalamus; QSM, quantitative susceptibility mapping.
