# Supplementary material for: Quantitative Susceptibility Mapping of Brain Iron Deposition in Patients With Recurrent Depression
Source: PubMed Central journal article supplement — Psychiatry Investig. 2022 Aug 24;19(8):668–75. doi: 10.30773/pi.2022.0110 (PMC9441458; doi:10.30773/pi.2022.0110), 2022-08-24
Supplement: pi-2022-0110-suppl3.pdf [file pi-2022-0110-suppl3.pdf]

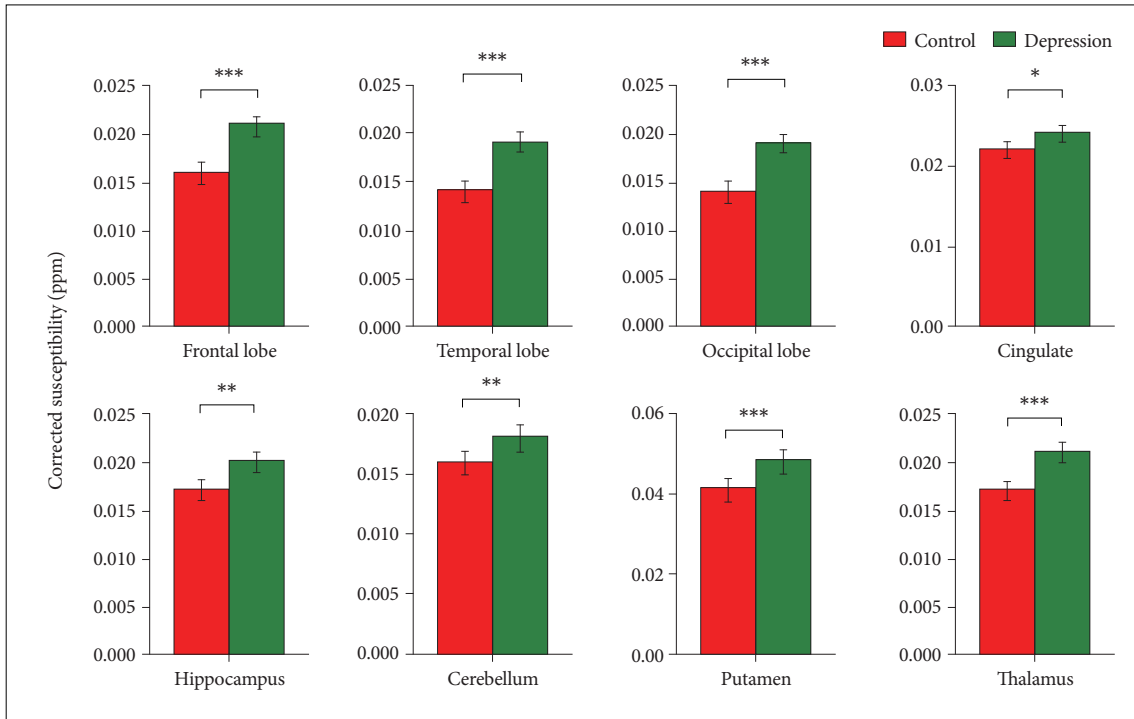

**Supplementary Figure 2.** Comparison between groups (mean ± standard error of the mean). \*signifies a group difference of  $p_{\text{Bonferroni}} < 0.05$ ; \*\*signifies a group difference of  $p_{\text{Bonferroni}} < 0.01$ ; \*\*\*signifies a group difference of  $p_{\text{Bonferroni}} < 0.001$ .
